# Supplementary material
Source: PubMed Central journal article supplement (PMC4527039)

## Appendix A. Estimated glomerular filtration rate (eGFR) at dialysis initiation by age group and one-year mortality risk

|               | Veteran, initiated dialysis within VA |                                           | Veteran, initiated dialysis outside VA, paid for by VA |                                           | Veteran, initiated dialysis outside VA, not paid for by VA |                                           | Nonveteran                 |                                           |
|---------------|---------------------------------------|-------------------------------------------|--------------------------------------------------------|-------------------------------------------|------------------------------------------------------------|-------------------------------------------|----------------------------|-------------------------------------------|
|               | Unadjusted eGFR, mean (SD)            | <sup>a</sup> Adjusted eGFR, mean (95% CI) | Unadjusted eGFR, mean (SD)                             | <sup>a</sup> Adjusted eGFR, mean (95% CI) | Unadjusted eGFR, mean (SD)                                 | <sup>a</sup> Adjusted eGFR, mean (95% CI) | Unadjusted eGFR, mean (SD) | <sup>a</sup> Adjusted eGFR, mean (95% CI) |
| All patients  | 9.27 (4.63)                           | 8.74 (8.66, 8.81)                         | 10.17 (4.81)                                           | 9.40 (9.24, 9.56)                         | 10.91 (5.68)                                               | 10.00 (9.97, 10.04)                       | 9.73 (5.37)                | 9.86 (9.85, 9.87)                         |
| Age group     |                                       |                                           |                                                        |                                           |                                                            |                                           |                            |                                           |
| <55 y         | 8.31 (4.38)                           | 7.87 (7.71, 8.03)                         | 9.50 (4.76)                                            | 8.78 (8.45, 9.11)                         | 9.09 (5.32)                                                | 8.85 (8.76, 8.94)                         | 8.69 (5.19)                | 8.71 (8.70, 8.73)                         |
| 55-64 y       | 9.31 (4.98)                           | 8.66 (8.52, 8.79)                         | 9.97 (4.60)                                            | 9.01 (8.77, 9.25)                         | 10.24 (5.71)                                               | 9.75 (9.67, 9.83)                         | 9.60 (5.24)                | 9.68 (9.65, 9.70)                         |
| 65-74 y       | 9.51 (4.40)                           | 8.97 (8.81, 9.13)                         | 10.32 (5.02)                                           | 9.62 (9.25, 9.99)                         | 10.81 (5.54)                                               | 10.24 (10.18, 10.31)                      | 10.13 (5.36)               | 10.23 (10.20, 10.25)                      |
| 75-84 y       | 9.81 (4.38)                           | 9.26 (9.07, 9.44)                         | 11.39 (5.08)                                           | 10.37 (9.96, 10.79)                       | 11.56 (5.69)                                               | 10.91 (10.85, 10.97)                      | 10.66 (5.43)               | 10.82 (10.80, 10.85)                      |
| ≥85 y         | 10.23 (4.84)                          | 9.40 (8.92, 9.89)                         | 10.67 (3.73)                                           | 9.53 (8.35, 10.72)                        | 12.33 (5.72)                                               | 11.43 (11.30, 11.56)                      | 11.12 (5.54)               | 11.28 (11.23, 11.34)                      |
| Risk quintile |                                       |                                           |                                                        |                                           |                                                            |                                           |                            |                                           |
| 1 (low risk)  | 8.34 (4.32)                           | 7.81 (7.66, 7.97)                         | 9.20 (3.80)                                            | 8.17 (7.90, 8.44)                         | 8.88 (4.73)                                                | 8.46 (8.38, 8.54)                         | 8.17 (4.51)                | 8.21 (8.19, 8.23)                         |
| 2             | 8.98 (4.49)                           | 8.41 (8.26, 8.56)                         | 10.10 (4.83)                                           | 9.03 (8.75, 9.32)                         | 10.02 (5.24)                                               | 9.39 (9.31, 9.48)                         | 9.24 (5.01)                | 9.32 (9.30, 9.34)                         |
| 3             | 9.32 (4.65)                           | 8.72 (8.55, 8.88)                         | 10.40 (5.25)                                           | 9.36 (9.03, 9.70)                         | 10.76 (5.45)                                               | 10.05 (9.96, 10.13)                       | 9.92 (5.34)                | 10.03 (10.00, 10.05)                      |
| 4             | 9.70 (4.66)                           | 9.11 (8.92, 9.29)                         | 10.67 (4.57)                                           | 9.60 (9.16, 10.03)                        | 11.40 (5.69)                                               | 10.66 (10.58, 10.73)                      | 10.47 (5.56)               | 10.60 (10.58, 10.63)                      |
| 5 (high risk) | 10.12 (4.82)                          | 9.50 (9.28, 9.73)                         | 11.55 (5.75)                                           | 10.61 (10.06, 11.16)                      | 11.96 (6.16)                                               | 11.27 (11.19, 11.34)                      | 11.04 (5.90)               | 11.16 (11.13, 11.18)                      |

<sup>a</sup>Adjusted for year, age, age<sup>2</sup>, sex, race, ethnicity, employment status, rurality, end-stage renal disease network, dialysis type, body mass index category, serum albumin, primary renal disease, and comorbid conditions (cardiac, stroke/transient ischemic attack, peripheral vascular disease, hypertension, diabetes mellitus, chronic obstructive pulmonary disease, malignancy, smoking, alcohol abuse, illicit drug use, and inability to walk or transfer).

**Appendix B. <sup>a</sup>Differences in the adjusted probability of dialysis initiation at eGFR  $\geq$ 10 mL/min/1.73 m<sup>2</sup>**

| Variable                                           | Difference in adjusted probability<br>(95% CI) <sup>b</sup> |
|----------------------------------------------------|-------------------------------------------------------------|
| Veteran status and location of dialysis initiation |                                                             |
| Veteran, initiated dialysis within VHA             | Reference                                                   |
| Veteran, initiated dialysis under VHA Fee Basis    | 0.06 (0.04, 0.07)                                           |
| Veteran, initiated dialysis outside VHA            | 0.09 (0.09, 0.10)                                           |
| Nonveteran                                         | 0.08 (0.08, 0.09)                                           |
| Year (y)                                           | 0.02 (0.02, 0.02)                                           |
| Age (y)                                            | 0.004 (0.004, 0.004)                                        |
| Sex                                                |                                                             |
| Male                                               | Reference                                                   |
| Female                                             | -0.09 (-0.09, -0.09)                                        |
| Race                                               |                                                             |
| White                                              | Reference                                                   |
| Black                                              | 0.01 (0.01, 0.02)                                           |
| Asian                                              | -0.11 (-0.11, -0.10)                                        |
| Native American                                    | -0.09 (-0.10, -0.09)                                        |
| Other/Missing                                      | -0.06 (-0.07, -0.05)                                        |
| Ethnicity                                          |                                                             |
| Non-Hispanic                                       | Reference                                                   |
| Hispanic                                           | -0.07 (-0.07, -0.06)                                        |
| Employment status                                  |                                                             |
| Employed full or part time                         | Reference                                                   |
| Unemployed                                         | 0.09 (0.08, 0.09)                                           |
| Retired/Homemaker                                  | 0.10 (0.10, 0.10)                                           |
| Other/Missing                                      | 0.07 (0.06, 0.07)                                           |
| Rurality                                           |                                                             |
| Urban                                              | Reference                                                   |
| Rural                                              | 0.01 (0.005, 0.01)                                          |
| Highly rural                                       | -0.02 (-0.03, -0.01)                                        |
| ESRD network                                       |                                                             |
| 1                                                  | Reference                                                   |
| 2                                                  | 0.02 (0.01, 0.02)                                           |
| 3                                                  | 0.03 (0.03, 0.04)                                           |
| 4                                                  | 0.05 (0.04, 0.05)                                           |
| 5                                                  | 0.08 (0.07, 0.08)                                           |
| 6                                                  | 0.03 (0.02, 0.03)                                           |
| 7                                                  | 0.04 (0.03, 0.05)                                           |
| 8                                                  | 0.02 (0.01, 0.03)                                           |
| 9                                                  | 0.09 (0.09, 0.10)                                           |
| 10                                                 | 0.09 (0.09, 0.10)                                           |
| 11                                                 | 0.10 (0.09, 0.11)                                           |
| 12                                                 | 0.11 (0.11, 0.12)                                           |
| 13                                                 | 0.07 (0.07, 0.08)                                           |
| 14                                                 | 0.06 (0.05, 0.07)                                           |
| 15                                                 | 0.11 (0.10, 0.12)                                           |
| 16                                                 | 0.07 (0.06, 0.07)                                           |
| 17                                                 | 0.06 (0.05, 0.06)                                           |
| 18                                                 | 0.10 (0.10, 0.11)                                           |
| Dialysis type                                      |                                                             |
| Hemodialysis                                       | Reference                                                   |
| Peritoneal dialysis                                | 0.07 (0.07, 0.08)                                           |
| Other/Missing                                      | 0.31 (0.29, 0.33)                                           |

|                                            |                      |
|--------------------------------------------|----------------------|
| BMI category                               |                      |
| Underweight, <18.5 kg/m <sup>2</sup>       | 0.06 (0.06, 0.07)    |
| Normal weight, 18.5-24.9 kg/m <sup>2</sup> | Reference            |
| Overweight, 25-29.9 kg/m <sup>2</sup>      | -0.02 (-0.03, -0.02) |
| Obese class 1, 30-34.9 kg/m <sup>2</sup>   | -0.02 (-0.03, -0.02) |
| Obese class 2, 35-39.9 kg/m <sup>2</sup>   | -0.01 (-0.01, -0.01) |
| Obese class 3, ≥40.0 kg/m <sup>2</sup>     | 0.01 (0.01, 0.02)    |
| Missing                                    | -0.004 (-0.01, 0.01) |
| Serum albumin                              |                      |
| ≥3 g/dL                                    | Reference            |
| <3 g/dL                                    | 0.01 (0.01, 0.01)    |
| Missing                                    | 0.02 (0.01, 0.02)    |
| Primary renal disease                      |                      |
| Diabetes mellitus                          | Reference            |
| Hypertension                               | -0.01 (-0.01, -0.01) |
| Glomerulonephritis                         | -0.07 (-0.08, -0.07) |
| Acute tubular necrosis                     | 0.03 (0.03, 0.04)    |
| Other renal disease                        | -0.02 (-0.03, -0.02) |
| Missing                                    | -0.03 (-0.04, -0.03) |
| Comorbid conditions                        |                      |
| Cardiac                                    | 0.09 (0.09, 0.09)    |
| Stroke/Transient ischemic attack           | 0.004 (0.001, 0.01)  |
| Peripheral vascular disease                | 0.02 (0.02, 0.02)    |
| Hypertension                               | -0.06 (-0.06, -0.06) |
| Diabetes mellitus                          | 0.10 (0.10, 0.11)    |
| COPD                                       | 0.05 (0.05, 0.06)    |
| Malignancy                                 | -0.03 (-0.04, -0.03) |
| Smoking                                    | -0.02 (-0.03, -0.02) |
| Alcohol abuse                              | 0.05 (0.04, 0.06)    |
| Illicit drug use                           | -0.02 (-0.03, -0.01) |
| Inability to walk or transfer              | 0.07 (0.07, 0.07)    |

<sup>a</sup>This table represents the marginal effect of each variable on the probability of starting dialysis at an eGFR ≥10 mL/min/1.73 m<sup>2</sup>. For example, female sex is associated with a 9.0 percentage point lower probability of early dialysis compared to male sex.

Abbreviations: BMI, body mass index; COPD, chronic obstructive pulmonary disease

<sup>b</sup>Adjusted for veteran status and location of dialysis initiation, year, age, age<sup>2</sup>, sex, race, ethnicity, employment status, rurality, ESRD network, dialysis type, BMI category, serum albumin <3 g/dL, primary renal disease, and comorbid conditions (cardiac, stroke/TIA, peripheral vascular disease, hypertension, diabetes mellitus, COPD, malignancy, smoking, alcohol abuse, illicit drug use, and inability to walk or transfer).

**Appendix C. Temporal trends in adjusted probability of dialysis initiation at eGFR  $\geq 10$  mL/min/1.73 m<sup>2</sup> in patients initiating dialysis at VA medical centers compared with: A) Veterans initiating dialysis outside the VA, paid for by the VA. B) Veterans initiating dialysis outside of the VA, not paid for by the VA. C) Nonveterans.**

**A)**

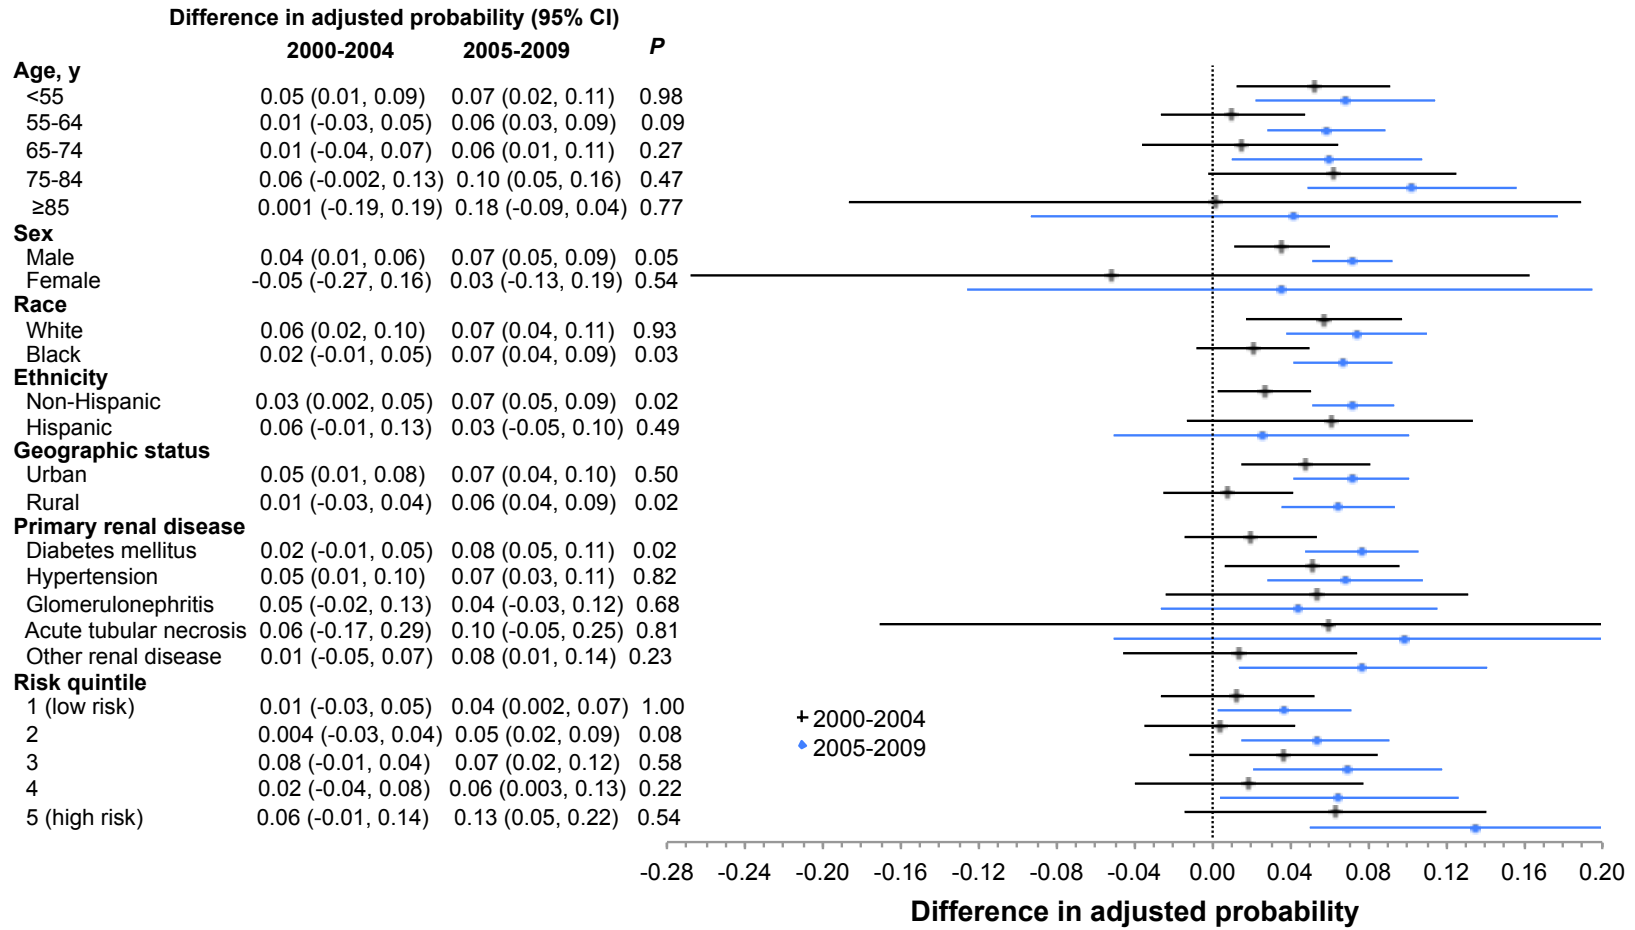

Higher probability of dialysis initiation at eGFR  $\geq 10$  mL/min/1.73 m<sup>2</sup> in veterans initiating dialysis within the VA ← | → Higher probability of dialysis initiation at eGFR  $\geq 10$  mL/min/1.73 m<sup>2</sup> in veterans initiating dialysis outside the VA, paid for by the VA

B)

**Difference in adjusted probability (95% CI)**

|                              | <b>2000-2004</b>   | <b>2005-2009</b>     | <b>P</b> |
|------------------------------|--------------------|----------------------|----------|
| <b>Age, y</b>                |                    |                      |          |
| <55                          | 0.07 (0.05, 0.09)  | 0.07 (0.04, 0.09)    | 0.20     |
| 55-64                        | 0.09 (0.07, 0.11)  | 0.08 (0.06, 0.10)    | 0.13     |
| 65-74                        | 0.09 (0.07, 0.10)  | 0.11 (0.09, 0.14)    | 0.25     |
| 75-84                        | 0.12 (0.10, 0.15)  | 0.11 (0.08, 0.13)    | 0.22     |
| ≥85                          | 0.14 (0.06, 0.21)  | 0.18 (0.13, 0.23)    | 0.40     |
| <b>Sex</b>                   |                    |                      |          |
| Male                         | 0.10 (0.09, 0.11)  | 0.09 (0.08, 0.11)    | 0.10     |
| Female                       | 0.05 (-0.03, 0.12) | 0.06 (-0.02, 0.13)   | 0.99     |
| <b>Race</b>                  |                    |                      |          |
| White                        | 0.09 (0.07, 0.10)  | 0.10 (0.08, 0.12)    | 0.60     |
| Black                        | 0.10 (0.09, 0.11)  | 0.10 (0.08, 0.11)    | 0.05     |
| <b>Ethnicity</b>             |                    |                      |          |
| Non-Hispanic                 | 0.09 (0.08, 0.10)  | 0.10 (0.09, 0.11)    | 0.21     |
| Hispanic                     | 0.09 (0.06, 0.12)  | 0.09 (0.06, 0.13)    | 0.36     |
| <b>Geographic status</b>     |                    |                      |          |
| Urban                        | 0.10 (0.09, 0.11)  | 0.10 (0.08, 0.11)    | 0.01     |
| Rural                        | 0.07 (0.06, 0.09)  | 0.10 (0.08, 0.12)    | 0.34     |
| <b>Primary renal disease</b> |                    |                      |          |
| Diabetes mellitus            | 0.10 (0.09, 0.12)  | 0.11 (0.09, 0.12)    | 0.45     |
| Hypertension                 | 0.10 (0.08, 0.11)  | 0.10 (0.08, 0.12)    | 0.33     |
| Glomerulonephritis           | 0.04 (0.01, 0.07)  | 0.04 (-0.0004, 0.07) | 0.44     |
| Acute tubular necrosis       | 0.05 (-0.02, 0.13) | 0.10 (0.04, 0.16)    | 0.42     |
| Other renal disease          | 0.09 (0.07, 0.12)  | 0.09 (0.06, 0.12)    | 0.15     |
| <b>Risk quintile</b>         |                    |                      |          |
| 1 (low risk)                 | 0.03 (0.002, 0.05) | 0.05 (0.02, 0.07)    | 0.60     |
| 2                            | 0.07 (0.05, 0.09)  | 0.09 (0.07, 0.11)    | 0.98     |
| 3                            | 0.09 (0.07, 0.11)  | 0.11 (0.08, 0.13)    | 0.79     |
| 4                            | 0.12 (0.10, 0.14)  | 0.11 (0.09, 0.14)    | 0.67     |
| 5 (high risk)                | 0.12 (0.10, 0.14)  | 0.14 (0.11, 0.17)    | 0.74     |

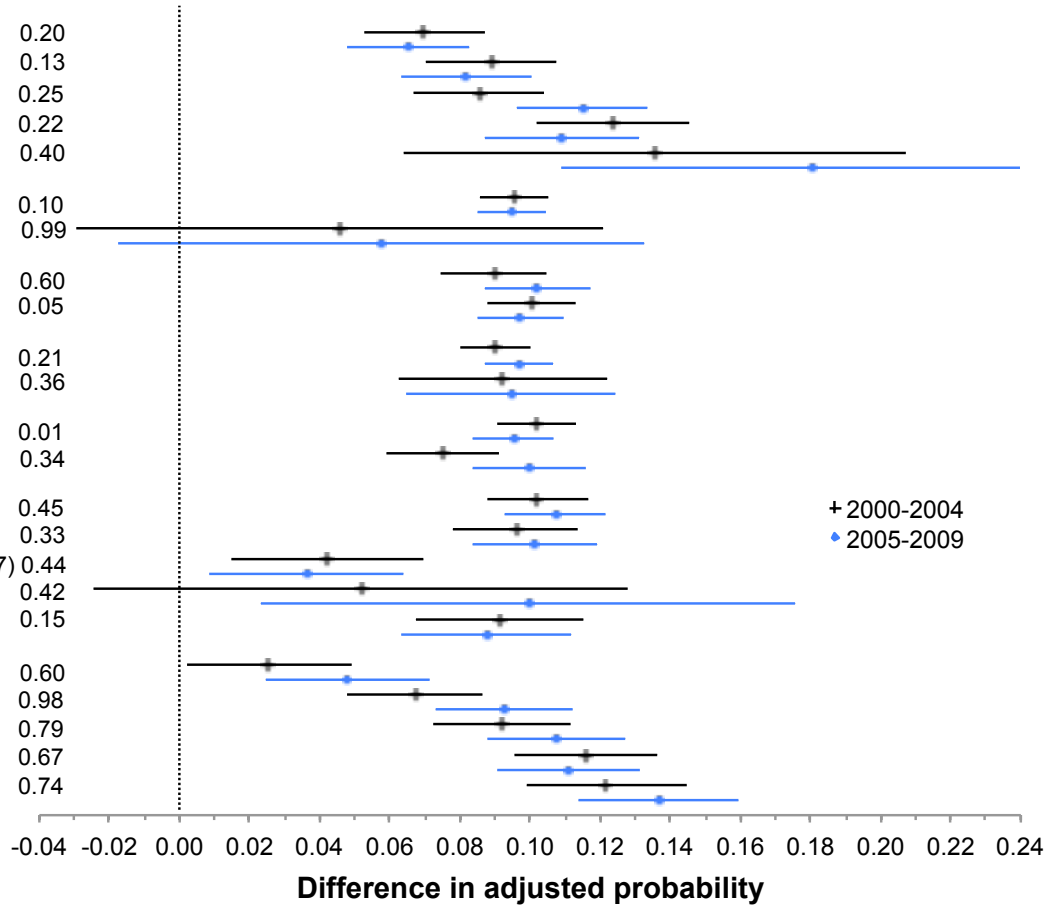

+ 2000-2004  
• 2005-2009

Higher probability of dialysis initiation at eGFR ≥10 mL/min/1.73 m<sup>2</sup> in veterans initiating dialysis within the VA

Higher probability of dialysis initiation at eGFR ≥10 mL/min/1.73 m<sup>2</sup> in veterans initiating dialysis outside the VA, not paid for by the VA

C)

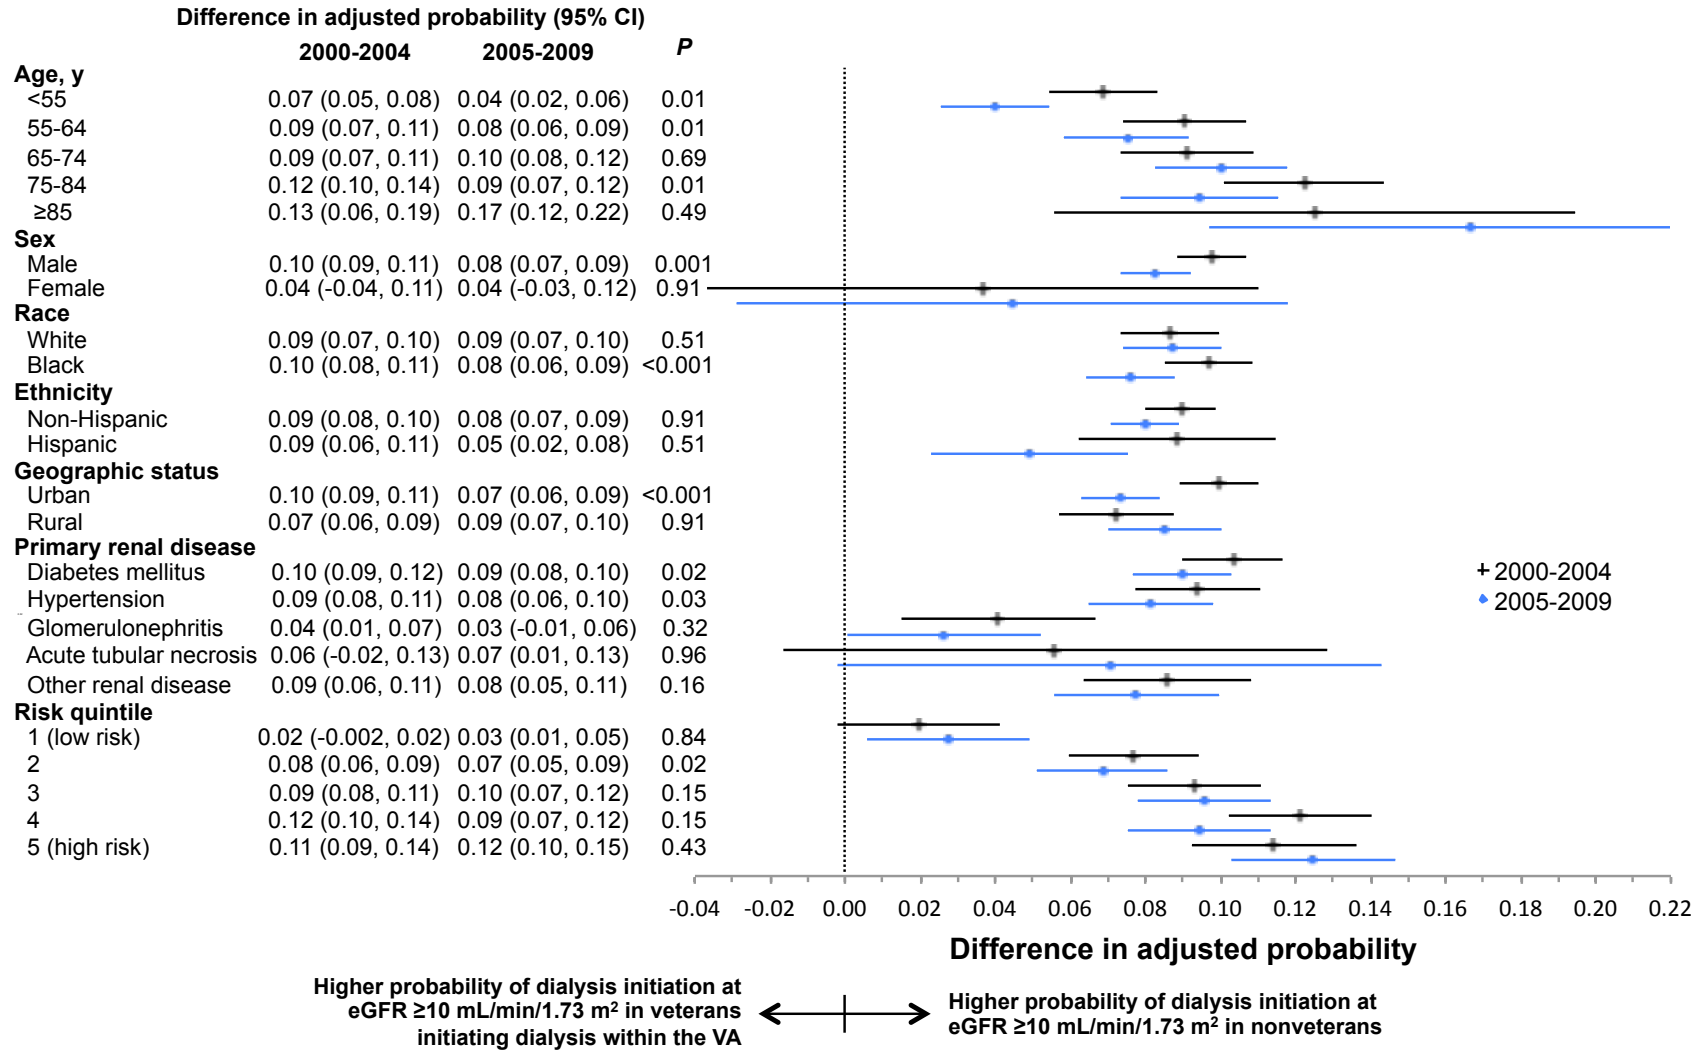

Supplement: CJN.12731214_CJN12731214SupplementaryData.pdf [file CJN.12731214_CJN12731214SupplementaryData.pdf]
